# Supplementary material for: From 0-dimension to 1-dimensions: Au nanocrystals as versatile plasmonic photocatalyst for broadband light induced RAFT polymerization
Source: Royal Society of Chemistry journal article supplement (doi:10.1039/d1py00088h), 2021-01-01
Supplement: d1py00088h1.pdf [file d1py00088h1.pdf]

*Supporting information*

**From 0-Dimension to 1-Dimensions: Au Nanocrystals as Versatile Plasmonic Photocatalyst for Broadband Light Induced RAFT Polymerization**

Junle Zhang,<sup>§</sup> Mengya Li,<sup>§</sup> Yanjie He, Xiaomeng Zhang, Zhe Cui, Peng Fu, Minying Liu, Xiaoguang Qiao\*, Qingxiang Zhao\* and Xinchang Pang\*

Henan Joint International Research Laboratory of Living Polymerizations and Functional Nanomaterials, Henan Key Laboratory of Advanced Nylon Materials and Application, School of Materials Science and Engineering, Zhengzhou University, Zhengzhou 450001, China

E-mail: [joexiaoguang@hotmail.com](mailto:joexiaoguang@hotmail.com)

[Pangxinchang1980@163.com](mailto:Pangxinchang1980@163.com)

[\*] To whom correspondence should be addressed.

[§] These authors contributed equally to this work.

### **Preparation of Au NCs**

Preparation of Au NSs.<sup>S1</sup> The seed solution consisted of trisodium citrate ( $5 \times 10^{-4}$  M, 10 mL) and  $\text{HAuCl}_4 \cdot 3\text{H}_2\text{O}$  ( $5 \times 10^{-4}$  M, 10 mL). Next, 0.6 mL of ice-cold, freshly prepared 0.1 M  $\text{NaBH}_4$  solution was added to the solution while stirring. The seed solution was kept at 25 °C and used within 2–3 h. For the growth solution,  $\text{HAuCl}_4 \cdot 3\text{H}_2\text{O}$  ( $5 \times 10^{-4}$  M, 45 mL) was mixed with CTAB (0.16 M, 45 mL). Ascorbic acid (0.1 M, 0.5 mL) was added to the growth solution. Next, 7 mL of seed solution was added while stirring. The particles prepared here were denoted as NS-A and also used as seeds for preparing NS-B 30 min after preparation. Au NSs were purified by centrifugation at 13000 rpm. NS-B was prepared by the same method.

Preparation of Au NRs.<sup>S2</sup> The seed solution consisted of CTAB (0.2 M, 10 mL) and  $\text{HAuCl}_4 \cdot 3\text{H}_2\text{O}$  ( $5 \times 10^{-4}$  M, 10 mL). Then,  $\text{NaBH}_4$  (0.01 M, 0.46 mL) in 0.01 M NaOH was added to the solution while stirring. The seed solution was kept at 25 °C and used within 2–3 h. For the growth solution,  $\text{HAuCl}_4 \cdot 3\text{H}_2\text{O}$  ( $1 \times 10^{-3}$  M, 100 mL) was mixed

with CTAB (0.2 M, 100 mL). Next, a certain amount of 0.01 M AgNO<sub>3</sub> solution (1, 2, 3, 5 and 8 mL, respectively) were added to the growth solution. After vigorous mixing, hydroquinone (0.1 M, 10 mL) was added sequentially into each sample under stirring. Finally, the seed solution (3.2 mL) was added into the growth solution, mixed thoroughly, and allowed to age overnight at 27 °C. Au NRs were purified by centrifugation at 13000 rpm. The Au NRs were denoted as NR-A, NR-B, NR-C, NR-D and NR-E, respectively.

**Table S1** Summary of different Au NCs

| Au NCs | Length (nm) | Diameter (nm) | Aspect Ratio | SPR <sub>T</sub> (nm) | SPR <sub>L</sub> (nm) |
|--------|-------------|---------------|--------------|-----------------------|-----------------------|
| NS-A   | /           | 12±2          | /            | 525                   | /                     |
| NS-B   | /           | 19±2          | /            | 531                   | /                     |
| NR-A   | 53±4        | 25±1          | 2.1          | 528                   | 603                   |
| NR-B   | 64±6        | 21±2          | 3.0          | 520                   | 741                   |
| NR-C   | 64±6        | 12±2          | 5.3          | 513                   | 855                   |
| NR-D   | 89±6        | 9±2           | 9.9          | 506                   | 1068                  |
| NR-E   | 90±6        | 8.0±1         | 11.2         | 505                   | 1072                  |

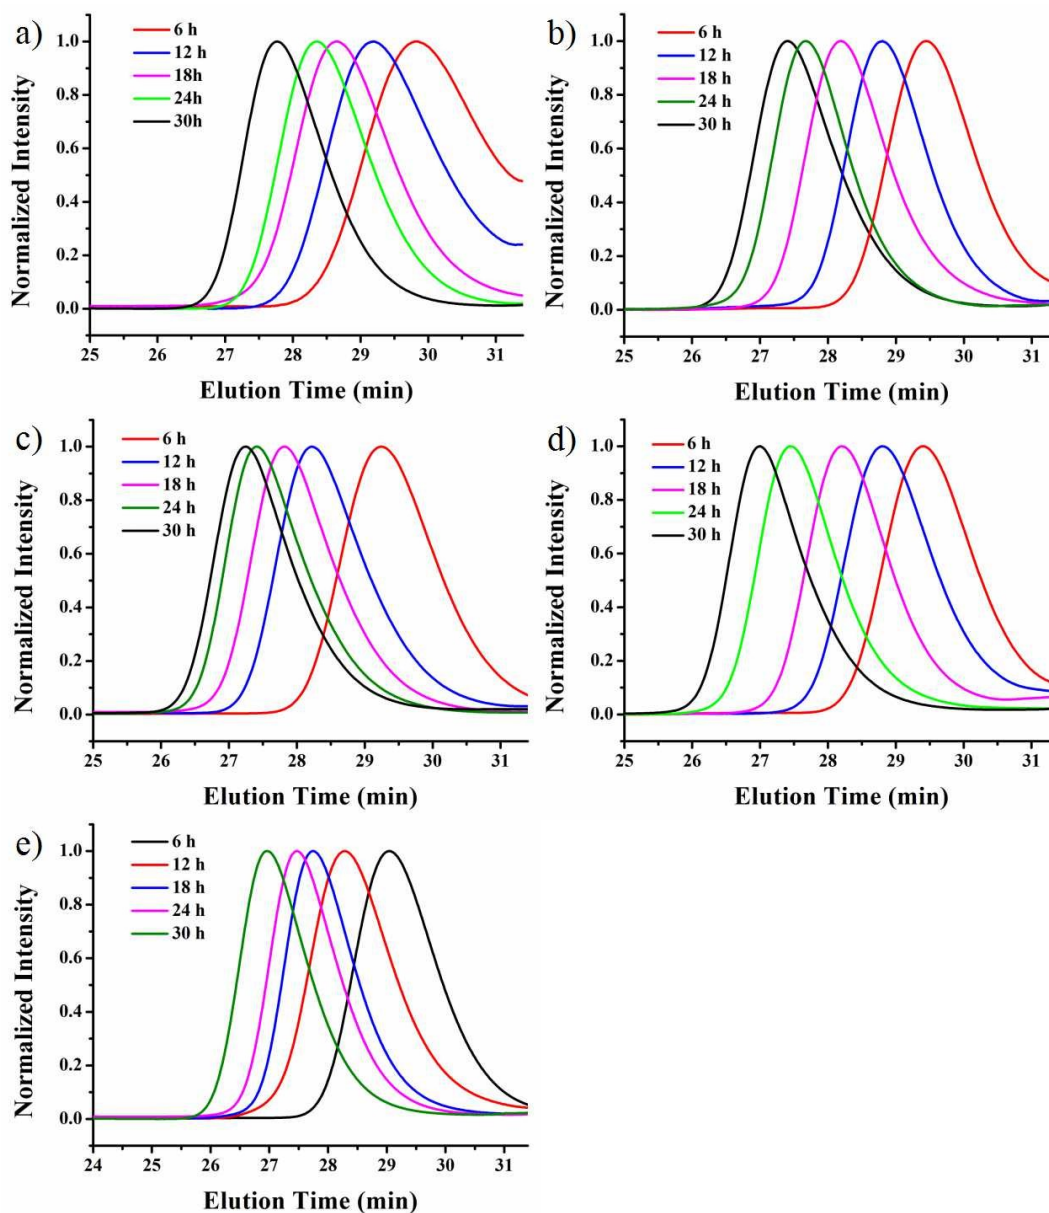

**Fig. S1** GPC traces of PET-RAFT polymerization of MMA catalyzed by Au NRs: a) NR-A, b) NR-B, c) NR-C, d) NR-D, e) NR-E. Room temperature; Green light ( $\lambda_{\text{max}} = 532 \text{ nm}$ ,  $1.5 \text{ mW/cm}^2$ ).

**Table S2** Au NCs catalyzed PET-RAFT polymerization of MMA with different NCs amounts

| Entry | Au NCs | [M]:[CTA] <sup>a</sup> | m <sub>pc</sub> (mg) | Conv. <sup>b</sup> (%) | M <sub>n,th</sub> <sup>c</sup> (KDa) | M <sub>n,GPC</sub> <sup>d</sup> (KDa) | M <sub>w</sub> /M <sub>n</sub> <sup>d</sup> |
|-------|--------|------------------------|----------------------|------------------------|--------------------------------------|---------------------------------------|---------------------------------------------|
|-------|--------|------------------------|----------------------|------------------------|--------------------------------------|---------------------------------------|---------------------------------------------|

|   |      |       |      |      |      |      |      |
|---|------|-------|------|------|------|------|------|
| 1 | NR-C | 200:1 | 0.25 | 23.6 | 5.0  | 6.3  | 1.16 |
| 2 | NR-C | 200:1 | 0.50 | 47.3 | 9.7  | 10.2 | 1.15 |
| 3 | NR-C | 200:1 | 0.75 | 56.1 | 11.5 | 12.5 | 1.16 |
| 4 | NR-C | 200:1 | 1.0  | 57.0 | 11.7 | 12.4 | 1.15 |
| 5 | NR-D | 200:1 | 0.25 | 47.4 | 9.8  | 10.6 | 1.15 |
| 6 | NR-D | 200:1 | 0.50 | 62.4 | 12.8 | 13.8 | 1.15 |

<sup>a</sup> The polymerizations were performed in DMF at room temperature using CPADB as CTA for MMA under green LED light irradiation ( $\lambda_{\max} = 532 \text{ nm}$ ,  $1.5 \text{ mW/ cm}^2$ ) for 30 hours; <sup>b</sup> Monomer conversion was calculated based on <sup>1</sup>H-NMR analysis; <sup>c</sup> Theoretical molecular weight was calculated according to the equation:  $M_{n,\text{th}} = [M]_0/[CTA]_0 \times M_W^M \times \alpha + M_W^{\text{CTA}}$ , where  $[M]_0$ ,  $[CTA]_0$ ,  $M_W^M$ ,  $\alpha$ , and  $M_W^{\text{CTA}}$  represent the initial monomer concentration, initial CTA concentration, molar mass of the monomer, conversion, and molar mass of CTA; <sup>d</sup> Molecular weight and dispersity were determined by GPC using THF as eluent.

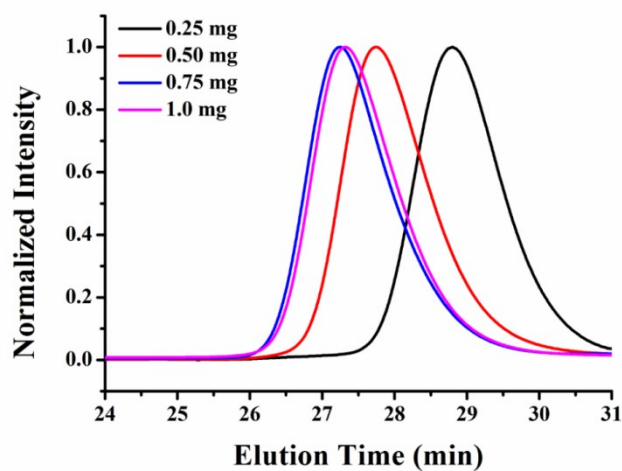

**Fig. S2** GPC traces of PET-RAFT polymerization of MMA with different amounts of NR-C (Table S2, entries 1-4).

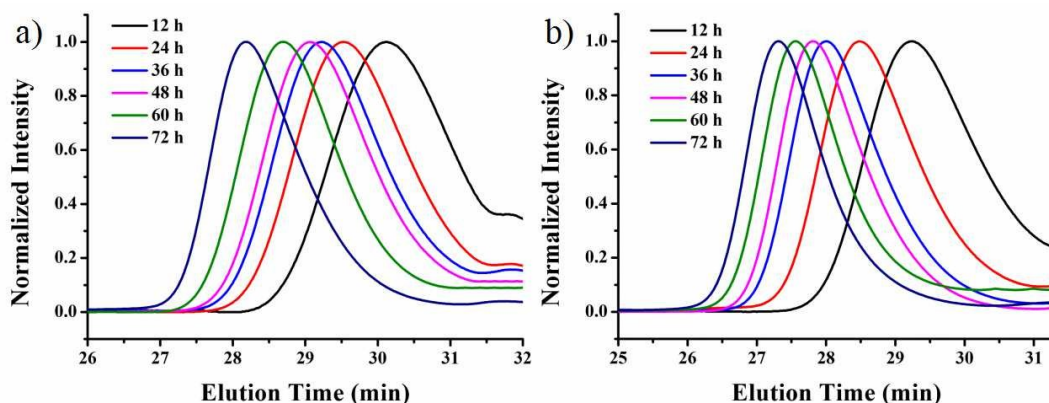

**Fig. S3** GPC traces of PET-RAFT polymerization of MMA catalyzed by Au NRs (NR-B): a) No TEA, b) involving TEA. Room temperature; NIR light ( $\lambda_{\max} = 740$  nm,  $0.7$  mW/cm<sup>2</sup>).

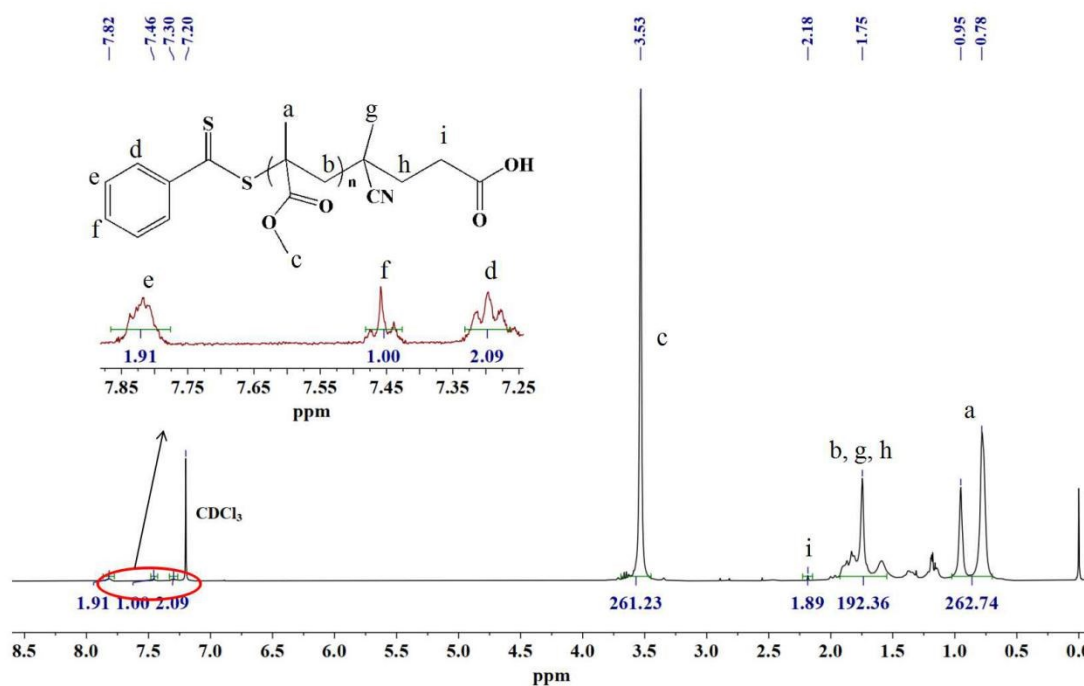

**Fig. S4** <sup>1</sup>H-NMR spectrum of PMMA synthesized by PET-RAFT polymerization catalyzed by NR-D ( $M_{n,th} = 8.8$  KDa,  $M_{n,GPC} = 8.7$  KDa,  $M_{n,NMR} = 9.0$  KDa).

**Note:** Molecular weight determined by NMR analysis using  $M_{n,NMR} = (I_c/3)/I_f \times M_W^{MMA} + M_W^{CPADB}$ , where  $I_c$  and  $I_f$  correspond to integrals of signal at 3.53 ppm and 7.46 ppm attributed to OCH<sub>3</sub> of MMA and phenyl group of CPADB agent (Z-group).

**Table S3** Au NCs catalyzed PET-RAFT polymerization of MMA in different solvents

| Entry | Au NCs | [M]:[CTA] <sup>a</sup> | Solvent | Conv. <sup>b</sup><br>(%) | $M_{n,th}$ <sup>c</sup><br>(KDa) | $M_{n,GPC}$ <sup>d</sup><br>(KDa) | $M_w/M_n$ <sup>d</sup> |
|-------|--------|------------------------|---------|---------------------------|----------------------------------|-----------------------------------|------------------------|
| 1     | NR-D   | 300:1                  | DMSO    | 89.7                      | 27.2                             | 30.5                              | 1.19                   |
| 2     | NR-D   | 300:1                  | DMF     | 77.7                      | 23.6                             | 23.4                              | 1.12                   |
| 3     | NR-D   | 300:1                  | MeCN    | 50.5                      | 15.4                             | 19.0                              | 1.16                   |
| 4     | NR-D   | 300:1                  | THF     | 42.7                      | 13.1                             | 15.9                              | 1.14                   |
| 5     | NS-B   | 300:1                  | THF     | 18.8                      | 5.9                              | 9.5                               | 1.21                   |
| 6     | NR-A   | 300:1                  | THF     | 22.6                      | 7.1                              | 10.3                              | 1.13                   |
| 7     | NR-C   | 300:1                  | THF     | 31.4                      | 9.7                              | 13.2                              | 1.11                   |

<sup>a</sup> The polymerizations were performed at room temperature using CPADB as CTA for MMA under green LED light irradiation ( $\lambda_{max} = 532$  nm, 1.5 mW/cm<sup>2</sup>) for 30 hours; <sup>b</sup> Monomer conversion was calculated based on <sup>1</sup>H-NMR analysis; <sup>c</sup> Theoretical molecular weight was calculated according to the equation:  $M_{n,th} = [M]_0/[CTA]_0 \times M_w^M \times \alpha + M_w^{CTA}$ , where  $[M]_0$ ,  $[CTA]_0$ ,  $M_w^M$ ,  $\alpha$ , and  $M_w^{CTA}$  represent the initial monomer concentration, initial CTA concentration, molar mass of the monomer, conversion, and molar mass of CTA; <sup>d</sup> Molecular weight and dispersity were determined by GPC using THF as eluent.

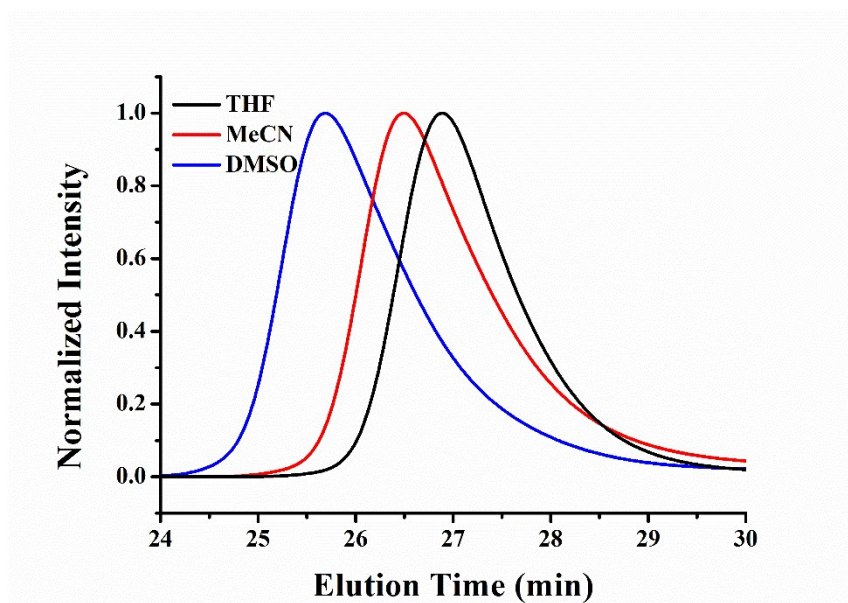

**Fig. S5** GPC traces of PET-RAFT polymerization of MMA catalyzed by Au NRs (NR-D) in different solvents (Table S3, entries 1, 3, 4).

**Table S4** Au NCs catalyzed PET-RAFT polymerization of different monomers

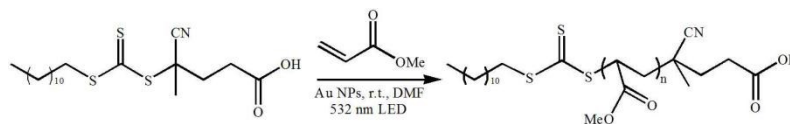

| Entry | Au NCs | [M]:[CTA] <sup>a</sup> | Monomer | Conv. <sup>b</sup><br>(%) | $M_{n,th}^c$<br>(KDa) | $M_{n,GPC}^d$<br>(KDa) | $M_w/M_n^d$ |
|-------|--------|------------------------|---------|---------------------------|-----------------------|------------------------|-------------|
| 1     | NR-D   | 300:1                  | MA      | 68.5                      | 18.0                  | 19.6                   | 1.16        |
| 2     | NR-D   | 300:1                  | BA      | 45.3                      | 17.7                  | 19.0                   | 1.18        |
| 3     | NR-D   | 300:1                  | St      | 30.4                      | 9.8                   | 6.8                    | 1.19        |

<sup>a</sup> The polymerizations were performed in DMF at room temperature using CDTPA as CTA under green LED light irradiation ( $\lambda_{max} = 532 \text{ nm}$ ,  $1.5 \text{ mW/cm}^2$ ) for 30 hours; <sup>b</sup> Monomer conversion was calculated based on <sup>1</sup>H-NMR analysis; <sup>c</sup> Theoretical molecular weight was calculated according to the equation:  $M_{n,th} = [M]_0/[CTA]_0 \times M_w^M \times \alpha + M_w^{CTA}$ , where  $[M]_0$ ,  $[CTA]_0$ ,  $M_w^M$ ,  $\alpha$ , and  $M_w^{CTA}$  represent the initial monomer concentration, initial CTA concentration, molar mass of the monomer, conversion, and molar mass of CTA; <sup>d</sup> Molecular weight and dispersity were determined by GPC using THF as eluent.

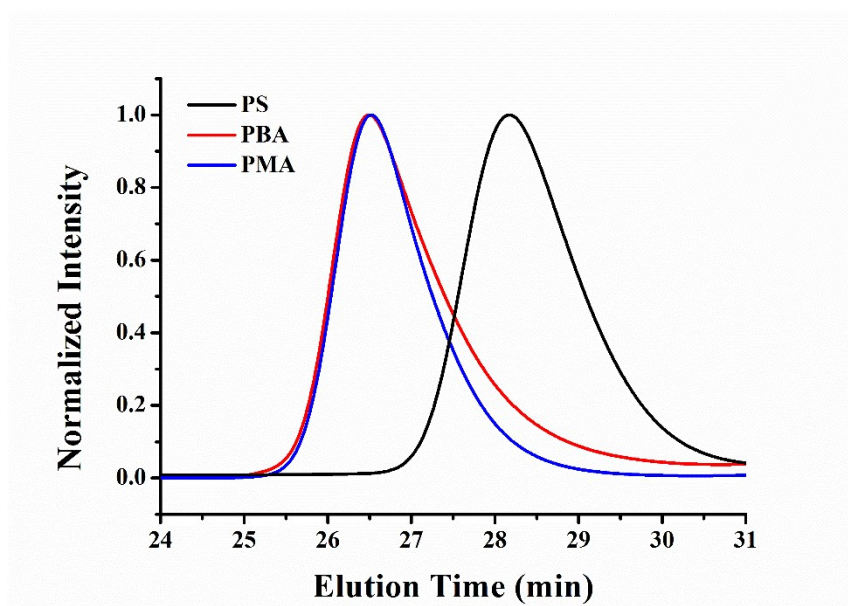



**Fig. S6** GPC traces of PET-RAFT polymerization of different monomers catalyzed by Au NRs (NR-D) (Table S4).

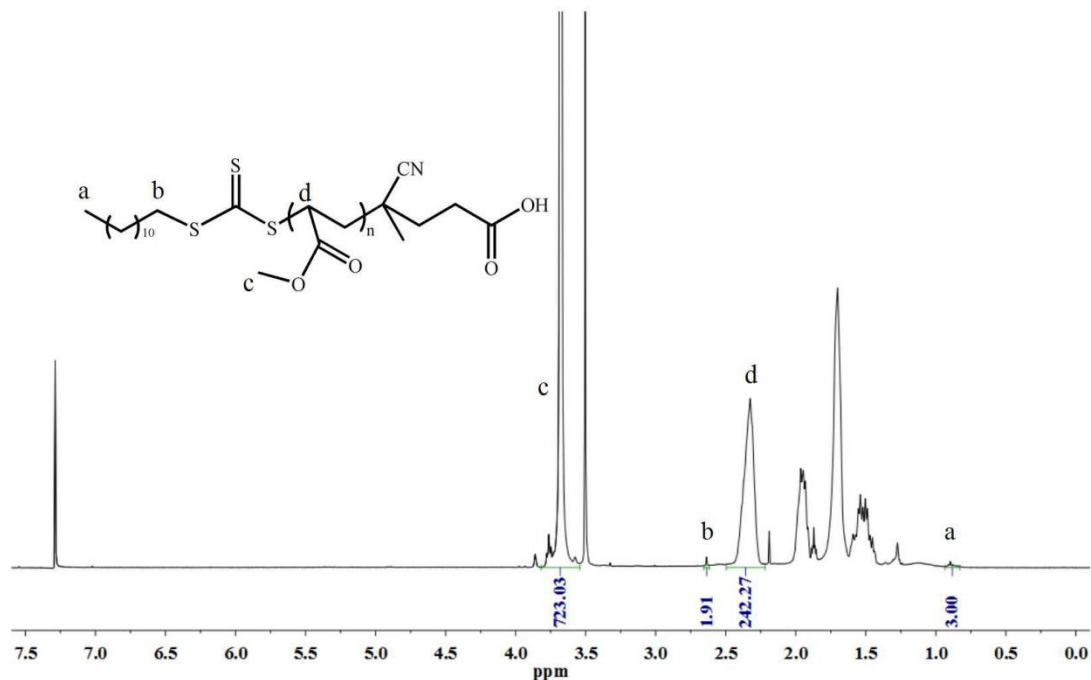

**Fig. S7** <sup>1</sup>H-NMR spectrum of PMA synthesized by PET-RAFT polymerization catalyzed by NR-D (Table S4, entry 1) ( $M_{n,NMR} = 21.1$  KDa).

**Note:** Molecular weight determined by NMR analysis using  $M_{n,NMR} = (I_c/3)/(I_a/3) \times M_W^{MA} + M_W^{CDTPA}$ , where  $I_c$  and  $I_a$  correspond to integrals of signal attributed to  $OCH_3$  of MA and methyl group of CDTPA agent (Z-group).

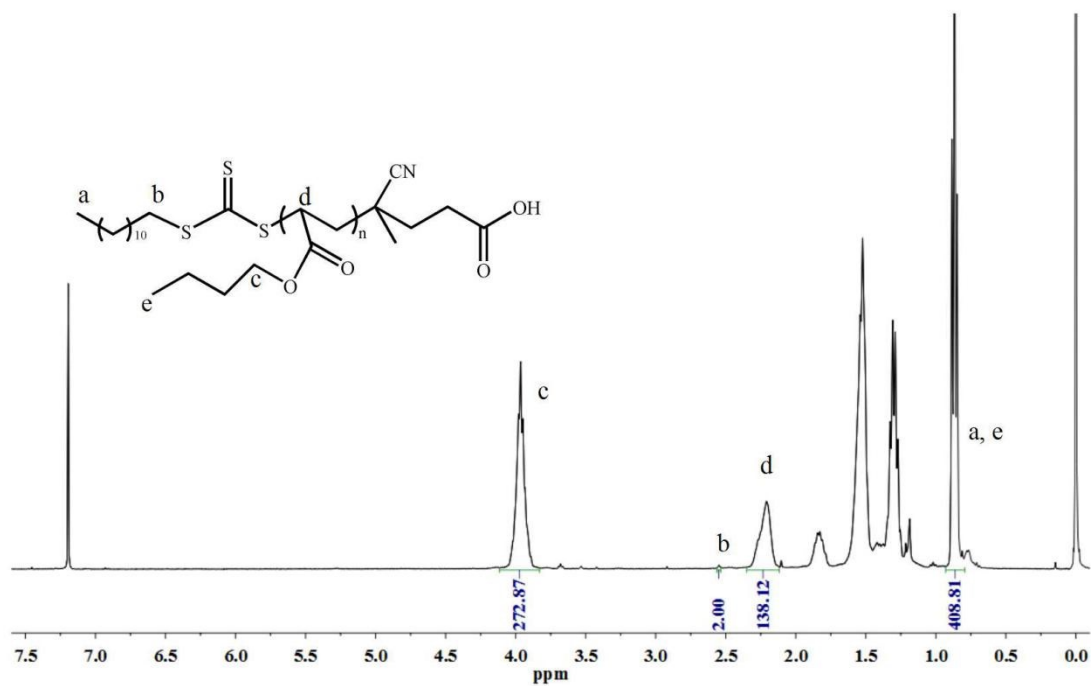

**Fig. S8** <sup>1</sup>H-NMR spectrum of PBA synthesized by PET-RAFT polymerization catalyzed by NR-D (Table S4, entry 2) ( $M_{n,NMR} = 17.9$  KDa).

**Note:** Molecular weight determined by NMR analysis using  $M_{n,NMR} = (I_c/2)/(I_b/2) \times M_W^{BA} + M_W^{CDTPA}$ , where  $I_c$  and  $I_b$  correspond to integrals of signal attributed to  $CH_2O$  of BA and sulfur-linked methylene group of CDTPA agent (Z-group).

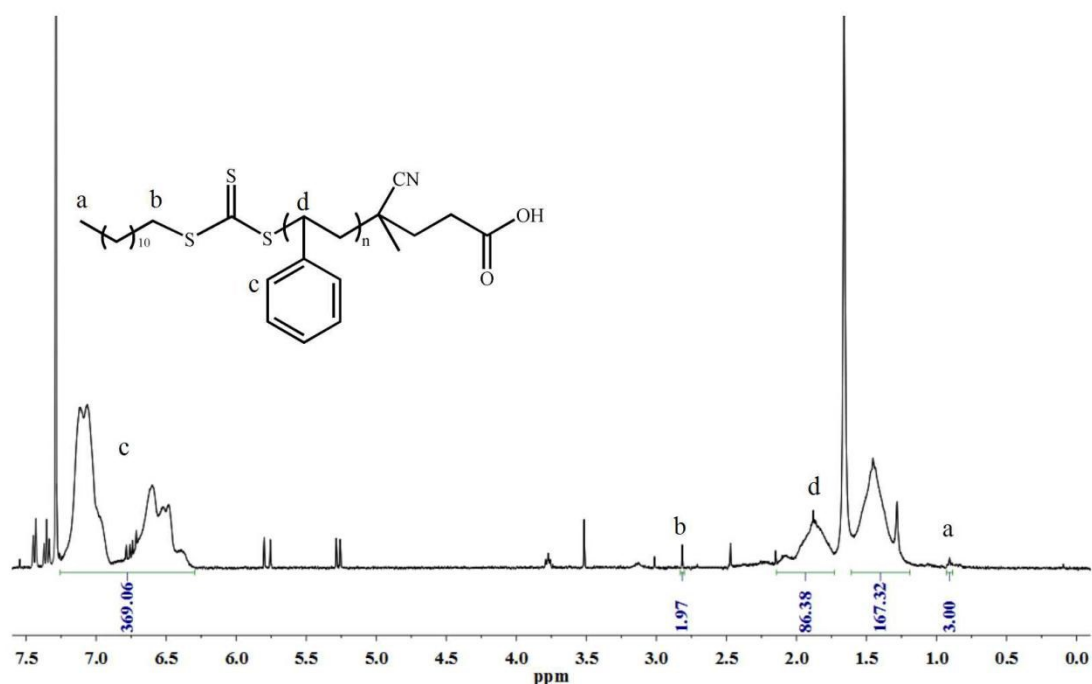

**Fig. S9**  $^1\text{H-NMR}$  spectrum of PS synthesized by PET-RAFT polymerization catalyzed by NR-D (Table S4, entry 3) ( $M_{n,\text{NMR}} = 8.1$  KDa).

**Note:** Molecular weight determined by NMR analysis using  $M_{n,\text{NMR}} = (I_c/5)/(I_a/3) \times M_W^{\text{St}} + M_W^{\text{CDTPA}}$ , where  $I_c$  and  $I_a$  correspond to integrals of signal attributed to phenyl group of St and methyl group of CDTPA agent (Z-group).

**Table S5** Au NCs catalyzed PET-RAFT polymerization for MMA with different DP

| Entry | Au NCs | [M]:[CTA] <sup>a</sup> | Solvent | Conv. <sup>b</sup><br>(%) | $M_{n,\text{th}}^c$<br>(KDa) | $M_{n,\text{GPC}}^d$<br>(KDa) | $M_w/M_n^d$ |
|-------|--------|------------------------|---------|---------------------------|------------------------------|-------------------------------|-------------|
| 1     | NR-D   | 100:1                  | DMF     | 66.7                      | 6.9                          | 6.8                           | 1.16        |
| 2     | NR-D   | 200:1                  | DMF     | 66.3                      | 13.6                         | 14.7                          | 1.15        |
| 3     | NR-D   | 300:1                  | DMF     | 77.7                      | 23.6                         | 23.4                          | 1.12        |
| 4     | NR-D   | 400:1                  | DMF     | 73.8                      | 29.8                         | 33.9                          | 1.15        |

<sup>a</sup> The polymerizations were performed in DMF at room temperature using CPADB as CTA for MMA under green LED light irradiation ( $\lambda_{\text{max}} = 532$  nm,  $1.5$  mW/cm<sup>2</sup>) for 30 hours; <sup>b</sup> Monomer conversion was calculated based on  $^1\text{H-NMR}$  analysis; <sup>c</sup> Theoretical molecular weight was calculated according to the equation:  $M_{n,\text{th}} = [\text{M}]_0/[\text{CTA}]_0 \times M_W^{\text{M}} \times \alpha + M_W^{\text{CTA}}$ , where  $[\text{M}]_0$ ,  $[\text{CTA}]_0$ ,  $M_W^{\text{M}}$ ,  $\alpha$ , and  $M_W^{\text{CTA}}$  represent the initial monomer concentration, initial CTA concentration, molar

mass of the monomer, conversion, and molar mass of CTA; <sup>d</sup> Molecular weight and dispersity were determined by GPC using THF as eluent.

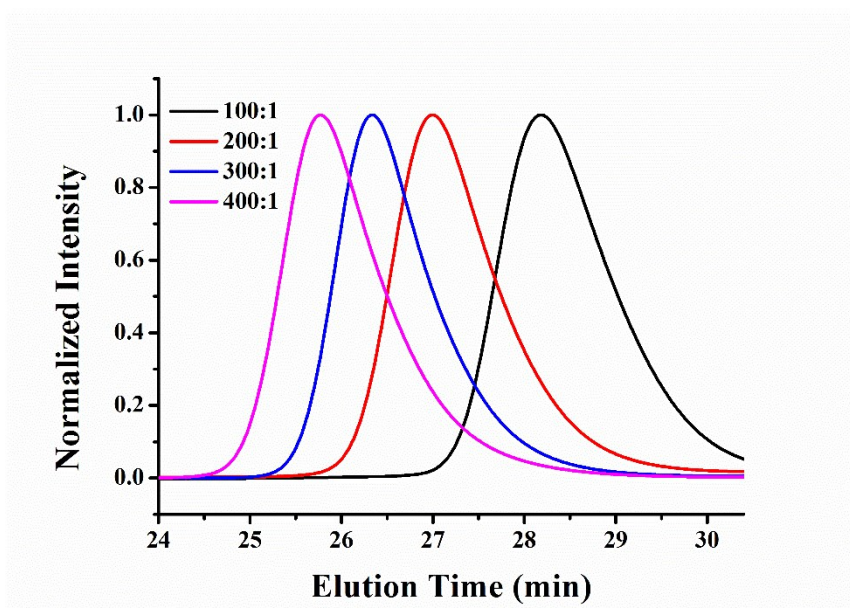

**Fig. S10** GPC traces of PET-RAFT polymerization of MMA with different DP catalyzed by Au NRs (NR-D) (Table S5).

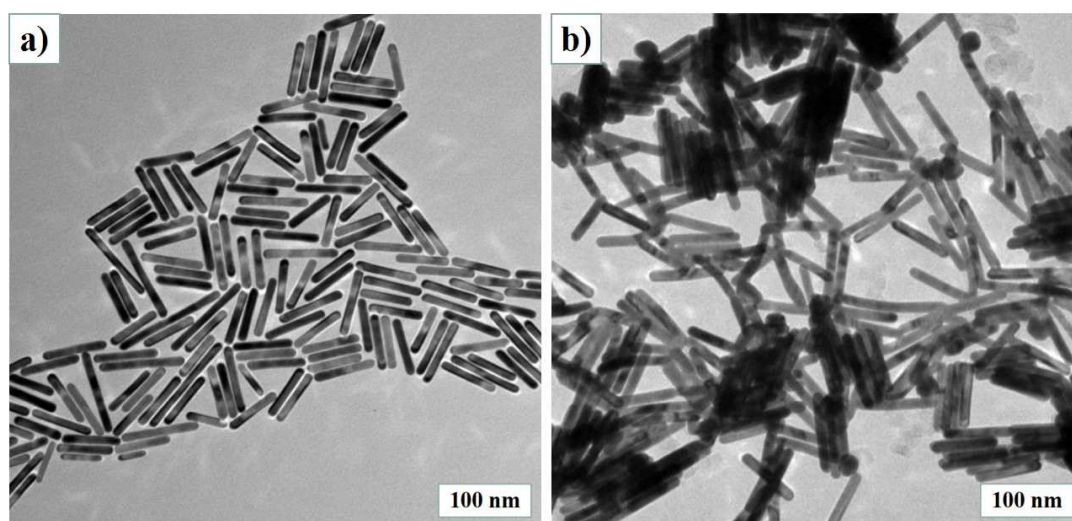

**Fig. S11** TEM image of regenerated Au NR-D photocatalyst before a) and after b) RAFT polymerization under green LED light ( $\lambda_{\max} = 532 \text{ nm}$ ,  $1.5 \text{ mW/cm}^2$ ) for 30 h in DMF.

## References

S1 N. R. Jana, L. Gearheart, C. J. Murphy, *Langmuir*, 2001, **17**, 6782-6786.

S2 L. Vigderman, E. R. Zubarev, *Chem. Mater.*, 2013, **25**, 1450-1457.
